# Supplementary material
Source: Springer Nature journal article supplement (https://www.springermedizin.de/resource/supplementary/12889_2012_5049_MOESM12_ESM.pdf/9493162)

District: Muang Phisanulok  
6501

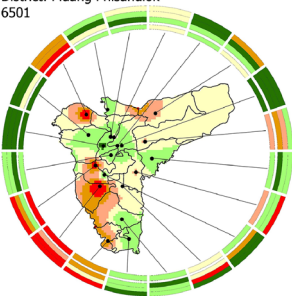

District: Nakhon Thai  
6502

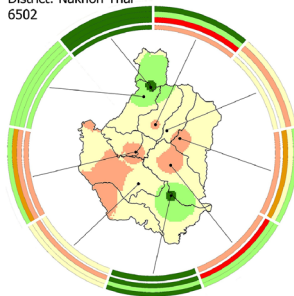

District: Chattakan  
6503

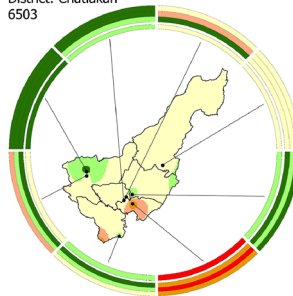

District: Bang Rakam  
6504

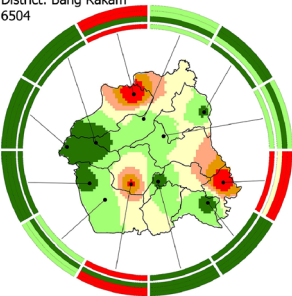

District: Bang Krathum  
6505

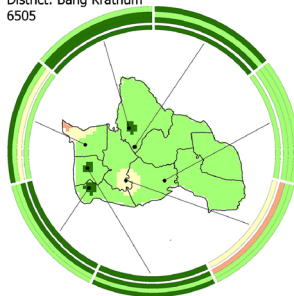

District: Phom Phiram  
6506

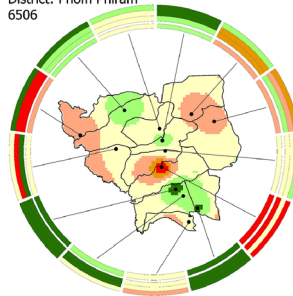

District: Wat Bot  
6507

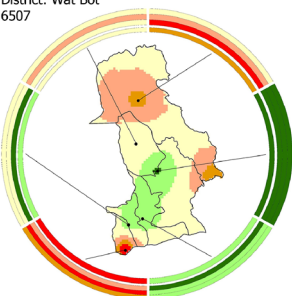

District: Wang Thong  
6508

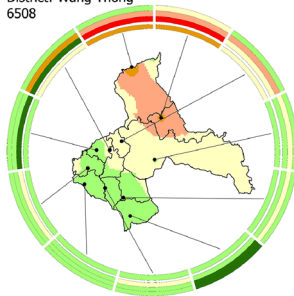

District: Noen Mapang  
6509

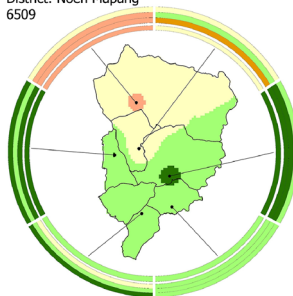

### Breteau Index (%)

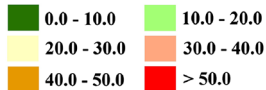

### Ring Key

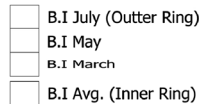

Supplement: MOESM12 [file 9493162]
